# Supplementary material for: EPD in 2020: enhanced data visualization and extension to ncRNA promoters
Source: PubMed Central journal article supplement (PMC7145694; doi:10.1093/nar/gkz1014), 2019-11-04
Supplement: gkz1014_supplemental_file.pdf [file gkz1014_supplemental_file.pdf]

## **EPD in 2020: Enhanced data visualization and extension to ncRNA promoters. Supplementary material.**

Patrick Meylan<sup>1</sup>, René Dreos<sup>1</sup>, Giovanna Ambrosini<sup>1,2</sup>, Romain Groux<sup>1,2</sup> and Philipp Bucher<sup>1,2,\*</sup>

<sup>1</sup> Swiss Institute of Bioinformatics (SIB), Lausanne, CH-1015, Switzerland

<sup>2</sup> School of Life Sciences, Swiss Federal Institute of Technology, Lausanne, CH-1015, Switzerland

\*To whom correspondence should be addressed. Tel: +41 21 693 0956; Fax: +41 21 693 1850; Email: [philipp.bucher@epfl.ch](mailto:philipp.bucher@epfl.ch).

Present Address: René Dreos, Center for Integrative Genomics, University of Lausanne, Lausanne, CH-1015, Switzerland

## Supplementary Tables:

**Table S1.** Content of the generic EPD viewer for human genome assembly hg38

| UCSC track name                                                                              | Description                                        | 1 bp <sup>a</sup> | 20 bp <sup>a</sup> | 100 bp <sup>a</sup> | Format | Reference      |
|----------------------------------------------------------------------------------------------|----------------------------------------------------|-------------------|--------------------|---------------------|--------|----------------|
| Selected histone marks                                                                       | H3K4me1 and H3K4me3 ChIP-seq tags                  | -                 | 2                  | -                   | wig    | Barski 2007    |
| Pol2                                                                                         | RNA polymerase II ChIP-seq tags                    | -                 | 1                  | -                   | wig    | Barski 2007    |
| Roadmap histones                                                                             | Roadmap histone marks, 116 tissues                 | -                 | 434                | 347                 | wig    | Romanoski 2015 |
| All CAGE (+)                                                                                 | 5' end of ENCODE CAGE reads, cell lines merged     | 1                 | -                  | -                   | wig    | Djebali 2012   |
| ENCODE CAGE                                                                                  | 5' end of ENCODE CAGE reads, 35 cell lines         | 70 <sup>b</sup>   | -                  | -                   | wig    | Djebali 2012   |
| All CAGE (-)                                                                                 | 5' end of ENCODE CAGE reads, all cell lines merged | 1                 | -                  | -                   | wig    | Djebali 2012   |
| All RAMPAGE (+)                                                                              | 5' end of RAMPAGE reads, all tissues merged        | 1                 | -                  | -                   | wig    | Batut 2016     |
| All RAMPAGE (-)                                                                              | 5' end of RAMPAGE reads, all tissues merged        | 1                 | -                  | -                   | wig    | Batut 2016     |
| All Fantom5 (+)                                                                              | 5' end of FANTOM5 CAGE reads, all tissues merged   | 1                 | -                  | -                   | wig    | Forrest 2014   |
| Fantom5 CAGE                                                                                 | 5' end of FANTOM5 CAGE reads, 555 tissues          | 1110 <sup>b</sup> | -                  | -                   | wig    | Forrest 2014   |
| All Fantom5 (-)                                                                              | 5' end of FANTOM5 CAGE reads, all tissues merged   | 1                 | -                  | -                   | wig    | Forrest 2014   |
| EPDnew promoters                                                                             | EPDnew promoters version 006                       | 1                 | -                  | -                   | bed    | Dreos 2017     |
| EPDnewNC promoters                                                                           | EPDnew non-coding promoters version 001            | 1                 | -                  | -                   | bed    | Meylan 2020    |
| <sup>a</sup> wig file resolution, <sup>b</sup> plus and minus strands are on separate tracks |                                                    |                   |                    |                     |        |                |

## References:

- Barski et al. 2007. High-resolution profiling of histone methylations in the human genome. *Cell* 129, 823-837.
- Romanoski et al. 2015. Epigenomics: Roadmap for regulation. *Nature* 518, 314-316.
- Djebali et al. 2012. Landscape of transcription in human cells. *Nature* 489, 101-108.
- Batut et al. 2016. High-fidelity promoter profiling reveals widespread alternative promoter usage and transposon-driven developmental gene expression. *Genome Res.* 23, 169-180.
- Forrest et al. 2014. A promoter-level mammalian expression atlas. *Nature* 507, 462-470
- Dreos et al. 2017. The eukaryotic promoter database in its 30th year: focus on non-vertebrate organisms. *Nucleic Acids Res.* 45, D51-D55.
- Meylan et al. 2020. (This paper).

**Table S2.** Contents overview of EPD track hubs

| Organism               | Assembly       | Number of tracks (resolution in bp) |                          |             |       |
|------------------------|----------------|-------------------------------------|--------------------------|-------------|-------|
|                        |                | TSS                                 | ChIP-seq                 | Nucleosomes | Total |
| <i>H. sapiens</i>      | <i>hg38</i>    | 1318 (1)                            | 3 (20/100 <sup>a</sup> ) |             | 1321  |
| <i>H. sapiens</i>      | <i>hg19</i>    | 1176 (1)                            | 3 (20/100)               |             | 1179  |
| <i>M. musculus</i>     | <i>mm10</i>    | 1018 (1)                            | 3 (10)                   | 4 (20)      | 1025  |
| <i>M. mulatta</i>      | <i>rheMac8</i> | 32 (1)                              |                          |             | 32    |
| <i>D. rerio</i>        | <i>danRer7</i> | 26 (1)                              | 2 (10)                   | 2 (25)      | 30    |
| <i>P. falciparum</i>   | <i>pfa2</i>    | 14 (1)                              |                          | 8 (10)      | 22    |
| <i>D. melanogaster</i> | <i>dm6</i>     | 16 (1)                              | 2 (10)                   |             | 18    |
| <i>R. norvegicus</i>   | <i>rn6</i>     | 12 (1)                              |                          |             | 12    |
| <i>C. familiaris</i>   | <i>canFam3</i> | 10 (1)                              |                          |             | 10    |
| <i>C. elegans</i>      | <i>ce6</i>     | 2 (1)                               | 1 (10)                   | 5 (10)      | 8     |
| <i>S. cerevisiae</i>   | <i>sacCer3</i> | 2 (1)                               | 2 (10)                   | 1 (10)      | 5     |
| <i>A. thaliana</i>     | <i>araTha1</i> | 2 (1)                               | 1 (20)                   | 1 (20)      | 4     |
| <i>S. pombe</i>        | <i>spo2</i>    | 2 (1)                               | 1 (10)                   | 1 (20)      | 4     |
| <i>G. gallus</i>       | <i>galGal5</i> | 2 (1)                               | 1 (25)                   |             | 3     |
| <i>Z. mays</i>         | <i>zm3</i>     | 2 (1)                               | 1 (25)                   |             | 3     |
| <i>A. mellifera</i>    | <i>amel5</i>   | 2 (1)                               |                          |             | 2     |

<sup>a</sup>20 bp for histone acetylations and H3K4 methylations, 100 bp for the other marks

## Supplementary Figures:

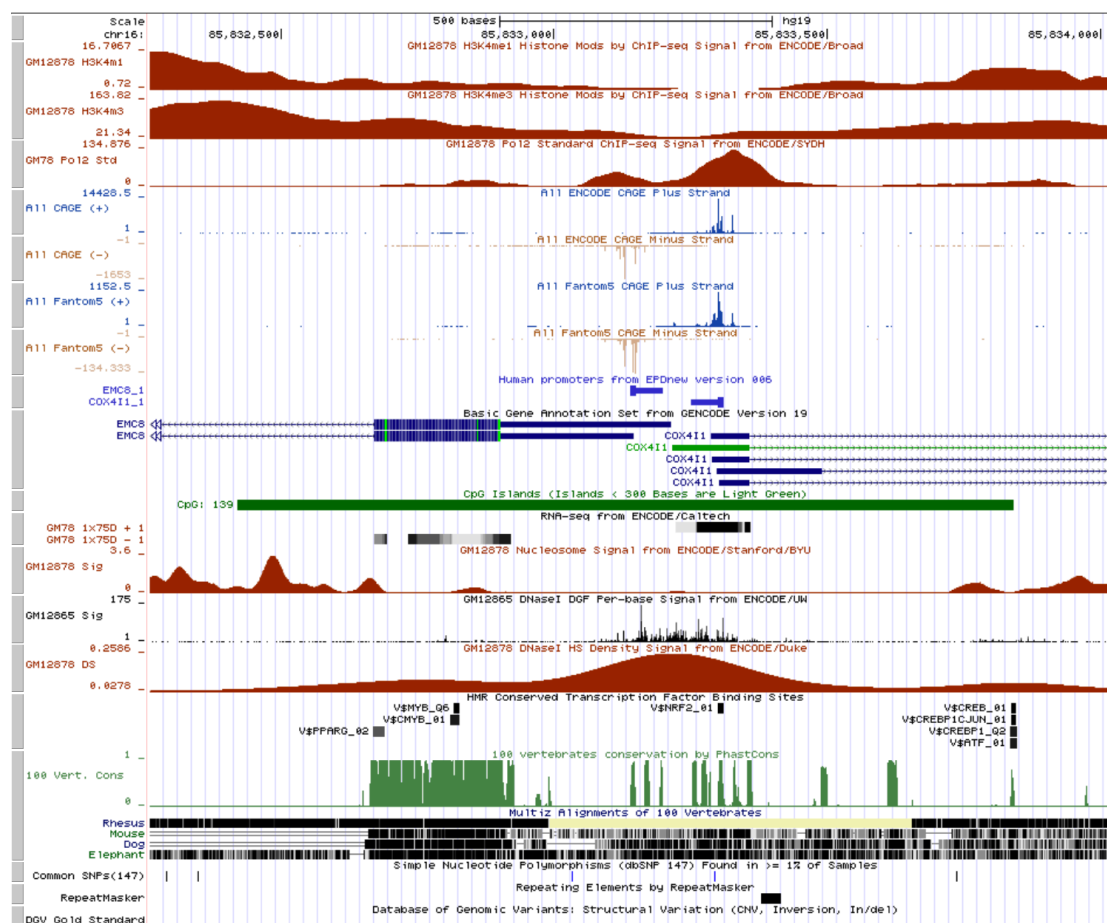

**Figure S1.** Genome browser screenshot of a promoter region visualized with the cell type-specific viewer for lymphoblastoid cell line GM12878. From top two bottom (track source in parentheses): CHIP-seq tracks for histone H3K4me1, H3K4me3 and RNA polymerase 2 (ENCODE-UCSC); single base resolution CAGE tracks for ENCODE and FANTOM5, all libraries combined (EPD); EPD promoter annotation track, thin and thick lines mark 50 bp upstream and 10 bp downstream regions relative to the dominant TSS (EPD); GENCODE genes (UCSC); CpG islands (UCSC); Caltech RNA-seq (ENCODE-UCSC); Nucleosomes (ENCODE-UCSC); Single-base resolution digital genomic footprints (ENCODE-UCSC); Low resolution DNase-seq track (ENCODE-UCSC); CHIP-seq peaks for selected transcription factors and RNA polymerase 2 subunits (ENCODE-UCSC); sequence conservation tracks, common SNPs from dbSNP and repetitive elements from RepeatMasker (UCSC). All experimental data tracks relate specifically to cell line GM12878.

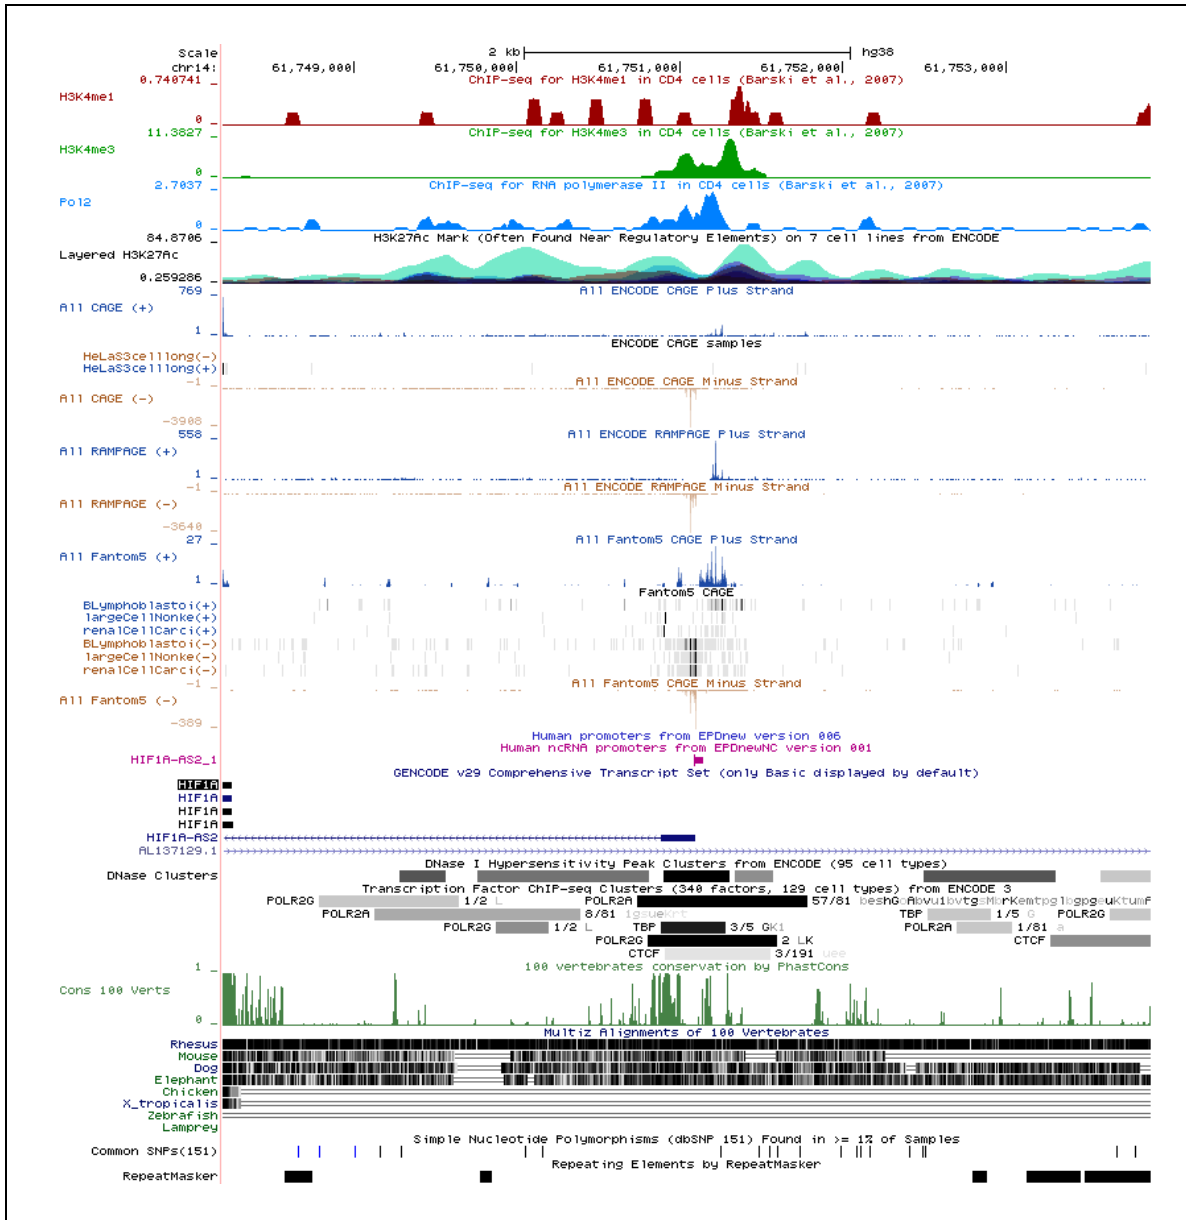

**Figure S2.** Genome browser screenshot of a human promoter of a non-coding RNA (gene HIF1A-AS2).

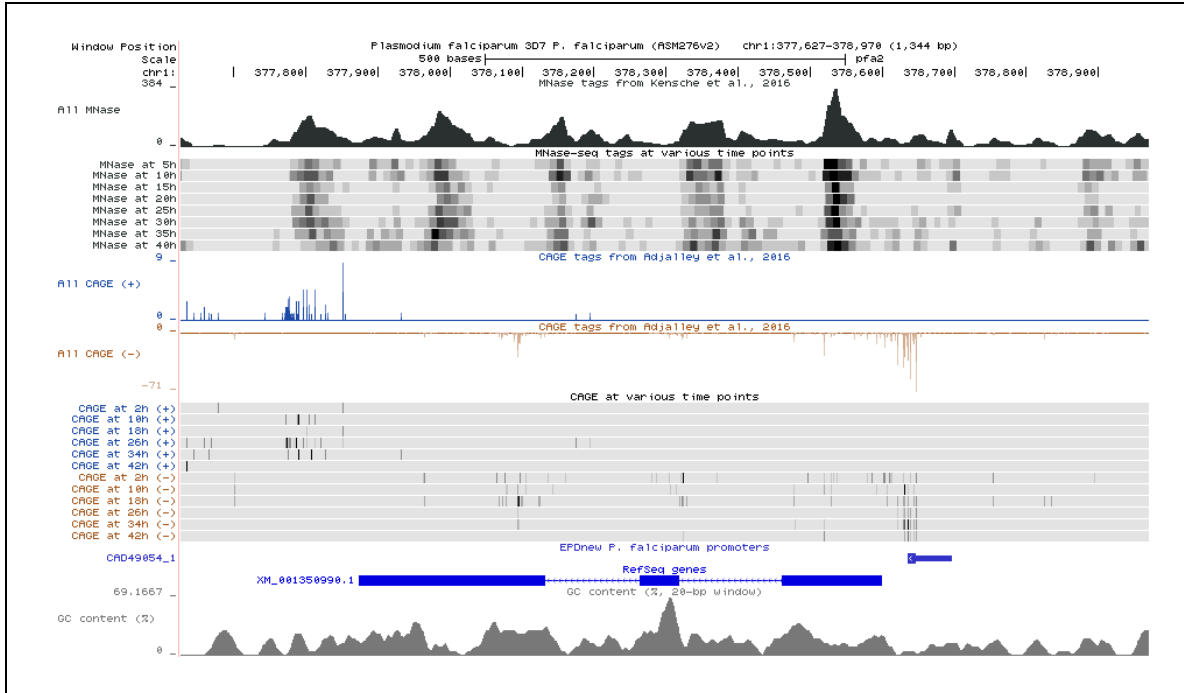

**Figure S3.** Screen shot of the *Plasmodium falciparum* viewer showing a promoter on the minus strand, with MNase tracks showing nucleosome phasing downstream of the TSS. The time points correspond to various stages of the intra-erythrocytic development cycle (IDC). Original data from Kensche et al. 2016, Nucleic Acids Res. 44, 2110–2124.
